# Supplementary material
Source: Research Square preprint supplement (doi:10.21203/rs.3.rs-10424359/v1)
Supplement: Supplementary file 1 [file 685eedb2080ee5fb5ab74a45.docx]

**Appendix A:**

**Bioinformatics tools and databases used for the computational characterization of hypothetical protein RvY_05612.**

| **Step** | **Tool/Database** | **Purpose** | **Output** |
| --- | --- | --- | --- |
| 1 | NCBI Protein Database | Retrieval of protein sequence and accession information | Protein FASTA sequence (GenBank: GAU93716.1) |
| 2 | UniProtKB | Verification of protein annotation, taxonomy, and functional information | Protein annotation and sequence metadata |
| 3 | ExPASy ProtParam | Prediction of physicochemical properties | Molecular weight, theoretical pI, instability index, aliphatic index, GRAVY, amino acid composition, estimated half-life |
| 4 | NCBI Conserved Domain Database (CDD) | Identification of conserved protein domains | Conserved domain(s), domain position, E-value, functional family assignment |
| 5 | BLASTp | Identification of homologous protein sequences | Sequence similarity, homologous proteins, evolutionary conservation |
| 6 | HHpred | Remote homology detection and structural template identification | Homologous proteins, probability score, E-value, structural features |
| 7 | SOPMA | Prediction of protein secondary structure | Percentage of α-helices, β-strands, β-turns, and random coils |
| 8 | PSIPRED | Graphical prediction of secondary structural elements | Secondary structure profile and confidence scores |
| 9 | SWISS-MODEL | Homology-based three-dimensional protein structure prediction | Predicted tertiary structure, GMQE score, template identity, structural model |
| 10 | UniProtKB and InterPro | Functional annotation and Gene Ontology (GO) analysis | Predicted biological process, cellular component, and molecular function |
| 11 | CELLO v2.5 | Prediction of subcellular localization | Predicted intracellular localization of the protein |
